# Supplementary material for: Facet-dependent activity and stability of Co3O4nanocrystals towards the oxygen evolution reaction
Source: Royal Society of Chemistry journal article supplement (doi:10.1039/c5cp02876k), 2015-01-01
Supplement: c5cp02876k1.pdf [file c5cp02876k1.pdf]

## Electronic Supplementary Information

|                                                                                     |   |
|-------------------------------------------------------------------------------------|---|
| Raman spectrum of $\text{Co}_3\text{O}_4$ nanocrystals .....                        | 2 |
| Crystal structure of $\text{Co}_3\text{O}_4$ and the (100) and (111) surfaces ..... | 3 |
| XPS spectra of $\text{Co}_3\text{O}_4$ nanocrystals .....                           | 4 |
| Faradaic efficiency from RRDE voltammetry .....                                     | 5 |
| BET surface area analysis .....                                                     | 6 |
| Capacitance measurement .....                                                       | 7 |
| Deconvolution of Co $2p_{3/2}$ XPS spectra .....                                    | 8 |
| Tables .....                                                                        | 9 |

### Raman spectrum of $\text{Co}_3\text{O}_4$ nanocrystals

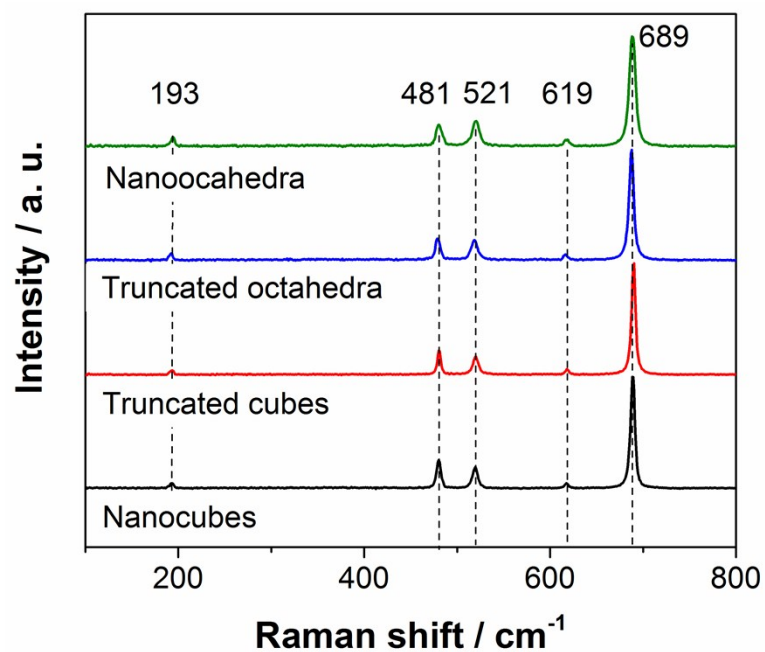

Figure S1. Raman spectra of  $\text{Co}_3\text{O}_4$  nanocubes, truncated cubes, truncated octahedra and nanooctahedra in powder form. Peaks at 193, 481, 521, 619, and 689  $\text{cm}^{-1}$  correspond to the  $\text{F}_{2g}$ ,  $\text{E}_g$ ,  $\text{F}_{2g}$ ,  $\text{F}_{2g}$ , and  $\text{A}_{1g}$  vibrational modes, respectively.

## Crystal structure of $\text{Co}_3\text{O}_4$ and the (100) and (111) surfaces

$\text{Co}_3\text{O}_4$  crystal models were constructed using Materials Studio Software. The Crystallographic Information File of  $\text{Co}_3\text{O}_4$  was obtained from the Inorganic Crystal Structure Database (ICSD #27497). The unit cell structure of  $\text{Co}_3\text{O}_4$  and the (100) and (111) surfaces are shown in Figure S2. In the two structures on the right, surface cobalt ions are indicated, where the superscripts T and O indicate tetrahedral and octahedral sites, respectively. The subscripts indicate the coordination number. These surface models were constructed according to the work from Zasada et al.<sup>1</sup> The (100) surface has protruding 2-fold coordinated  $\text{Co}^{2+}$  in tetrahedral sites and 5-fold coordinated  $\text{Co}^{3+}$  in octahedral sites. The (111) surface is characterized by 3-fold coordinated  $\text{Co}^{3+}$  ions in octahedral sites and 3-fold coordinated  $\text{Co}^{2+}$  in tetrahedral sites. The strong under-saturation of the  $\text{Co}^{3+}$  ions on the (111) surface may be one of the reasons for the higher OER activity of the nanooctahedra.

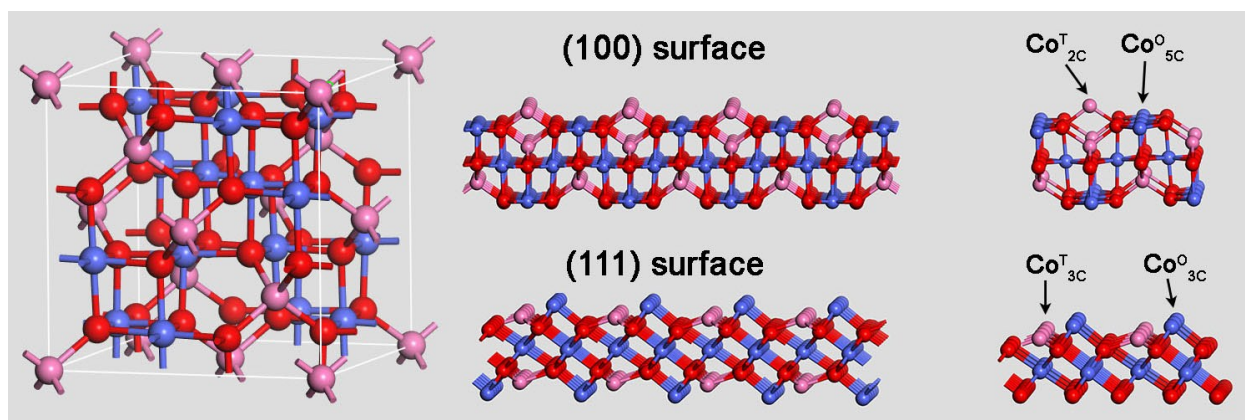

Figure S2. Crystal model of  $\text{Co}_3\text{O}_4$  and the (100) and (111) surfaces. Rightmost panel shows surface cobalt ions on the (100) and (111) surfaces.

[1] F. Zasada, W. Piskorz, P. Stelmachowski, A. Kotarba, J.-F. Paul, T. Plocinski, K. J. Kurzydowski, Z. Sojka, J. Phys. Chem. C, 2011, **115**, 6423-6432.

## XPS spectra of $\text{Co}_3\text{O}_4$ nanocrystals

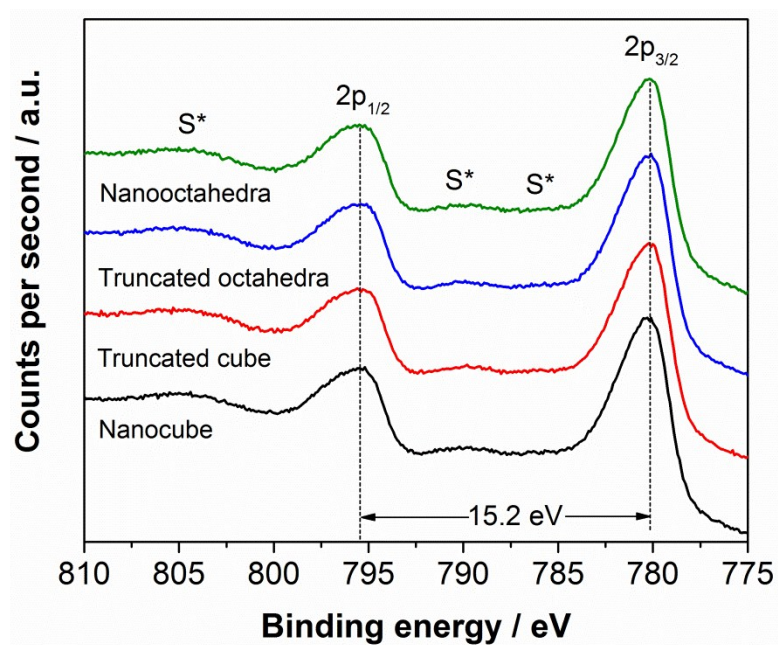

Figure S3. Co 2p XPS spectra of  $\text{Co}_3\text{O}_4$  nanocubes, truncated cubes, truncated octahedra, and nanooctahedra in powder form.

### Faradaic efficiency from RRDE voltammetry

Rotating ring disk electrode (RRDE) voltammetry was performed to confirm the production of oxygen and calculate the Faradaic efficiency. When the working electrode potential is swept anodic, oxygen is generated from the  $\text{Co}_3\text{O}_4$  surface and is swept towards the platinum ring by the rotating action of the electrode. When the platinum ring is held at  $-0.5$  V vs.  $\text{Ag}/\text{AgCl}$ , it facilitates the reduction of oxygen to hydrogen peroxide through the following reaction:

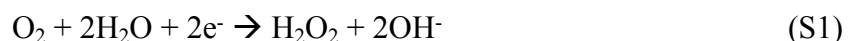

The Faradaic Efficiency can be calculated from the ring current ( $I_R$ ), disk current ( $I_D$ ) and collection efficiency ( $N$ ) as follows:<sup>2</sup>

$$\text{Faradiac Efficiency} = \left| \frac{I_R n_D}{N I_D n_R} \right| \quad (\text{S2})$$

In Eq. S2,  $n_D$  and  $n_R$  are the number of electrons transferred in the disk reaction and ring reaction which is 4 and 2, respectively.  $N$  is a parameter defined by the geometry of the electrode and has a value of 25.6% according to the manufacturer. Data from RRDE experiments are shown in Figure S4. Based on RRDE experiments, the Faradic efficiency for  $\text{Co}_3\text{O}_4$  nanocubes and nanooctahedra is 83.3% and 82.1% at 1.7 V vs. RHE. Chou et al reported a Faradaic Efficiency of 95% for 10 nm  $\text{Co}_3\text{O}_4$  nanoparticles using a fluorescence based oxygen sensor.<sup>3</sup> We believe the discrepancies are due to two factors. First, the particle size and morphologies are very different between our study and the work from Chou et al.<sup>3</sup> Secondly, small oxygen gas bubbles were formed and adhered to the area between the glassy carbon and platinum ring during the RRDE experiments. This could affect the diffusion of oxygen to the platinum ring electrode and result in a smaller ring current and lower Faradaic Efficiency.

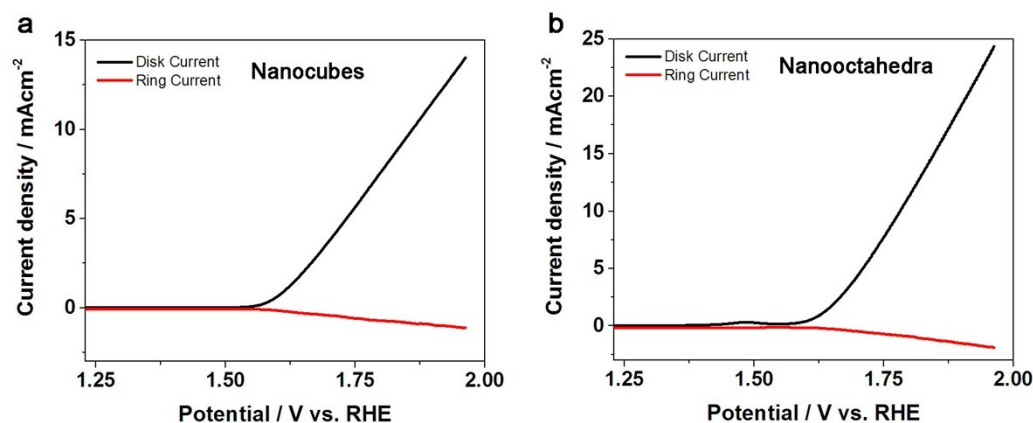

Figure S4 RRDE voltammetry of  $\text{Co}_3\text{O}_4$  a) nanocubes and b) nanooctahedra.

[2] Y. Liu, S. X. Guo, A. M. Bond, J. Zhang, S. Du, *Electrochim. Acta*, 2013, **101**, 201-208.

[3] N. H. Chou, P. N. Ross, A. T. Bell, T. D. Tilley, *ChemSusChem*, 2011, **4**, 1566-1569.

## BET surface area analysis

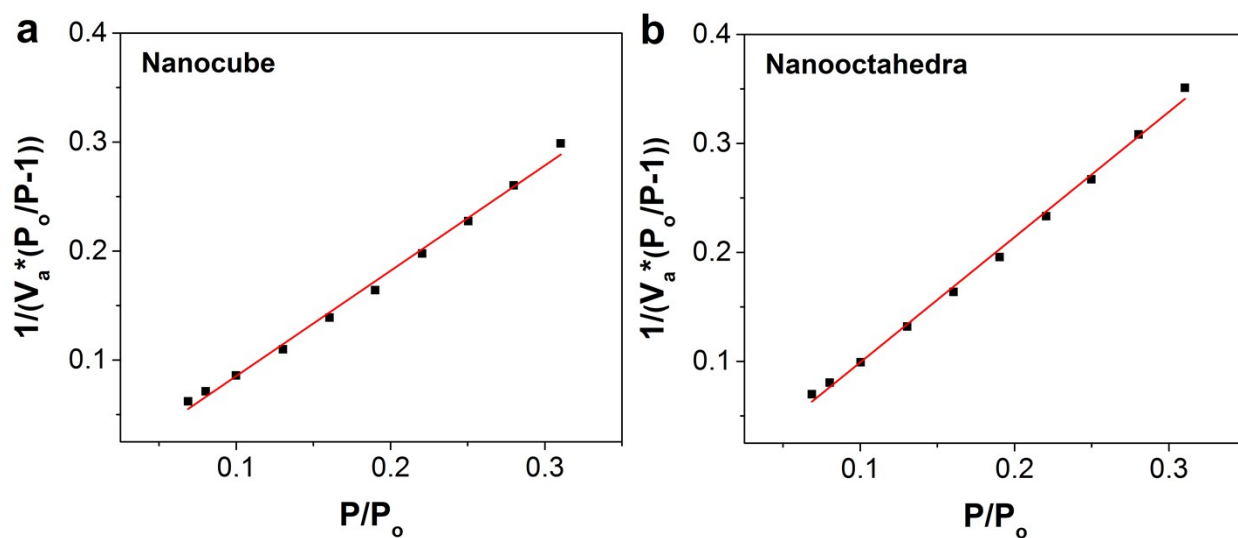

Figure S5. BET multipoint measurements for  $\text{Co}_3\text{O}_4$  (a) nanocubes and (b) nanooctahedra. The slopes and intercepts from the linear fits (red line) to the data (black dots) were used to calculate the surface area of the nanocrystal samples. Based on these calculations, surface areas for the  $\text{Co}_3\text{O}_4$  nanocubes was  $4.5 \text{ m}^2\text{g}^{-1}$  and that for  $\text{Co}_3\text{O}_4$  nanooctahedra was  $3.7 \text{ m}^2\text{g}^{-1}$ .

## Capacitance measurement

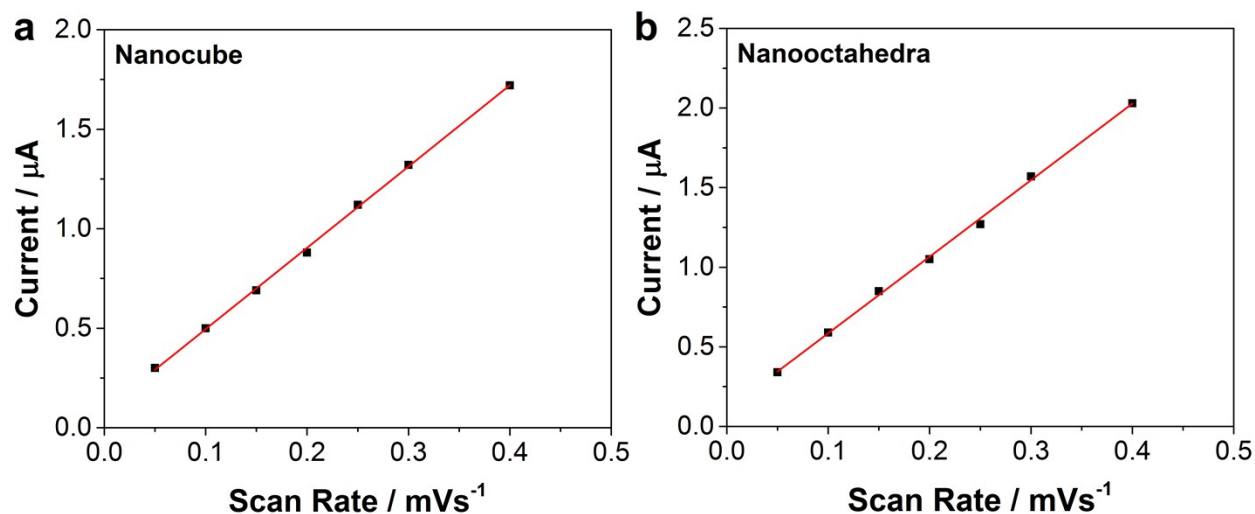

Figure S6. Current as a function of potential-scan rate (a)  $\text{Co}_3\text{O}_4$  nanocubes and (b) nanooctahedra. The slope of the best fit line (red line) to the data (black dots) can be defined as the capacitance of the catalysts on the glassy carbon working electrode. The capacitance of the  $\text{Co}_3\text{O}_4$  nanocube modified electrode and nanooctahedra modified electrode was  $4.1$  and  $4.9 \mu\text{Fcm}^{-2}$ , respectively.

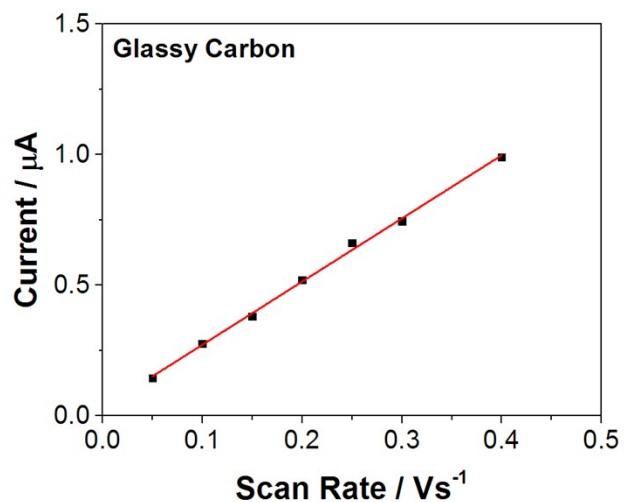

Figure S7. Current as a function of potential-scan rate of clean glassy carbon working electrode. The capacitance of the was  $2.4 \mu\text{Fcm}^{-2}$ .

## Deconvolution of Co 2p<sub>3/2</sub> XPS spectra

The Co 2p<sub>3/2</sub> XPS spectra of Co<sub>3</sub>O<sub>4</sub> nanocrystals in Figure 4 are deconvoluted into five components at 779.8, 781.1, 782.4, 785.1, and 789.1 eV. The first component is due to the main photoelectron lines from Co<sup>2+</sup> and Co<sup>3+</sup> ions, and the other component peaks are due to satellite shake-up peaks from either Co<sup>2+</sup> or Co<sup>3+</sup> ions. We assigned the components at 779.8 and 782.4 eV to Co<sup>2+</sup> ions because two peaks at 780.7 and 782.5 eV were observed in the Co 2p<sub>3/2</sub> XPS spectrum of Co(OH)<sub>2</sub> obtained by Yang et al.<sup>4</sup> Similarly, we assigned the components at 779.8 and 781.1 eV to Co<sup>3+</sup> ions because two peaks at 780.4 and 781.7 eV were observed in the Co 2p<sub>3/2</sub> XPS spectrum of CoOOH obtained by Yang et al.<sup>4</sup> Since only Co<sup>2+</sup> ions are present in Co(OH)<sub>2</sub> and only Co<sup>3+</sup> ions are present in CoOOH, the component at 779.8 eV should be attributed to both Co<sup>2+</sup> and Co<sup>3+</sup> while peaks at 781.1 and 782.4 eV are attributed uniquely to Co<sup>3+</sup> and Co<sup>2+</sup>, respectively. To deconvolute the Co 2p<sub>3/2</sub> XPS spectra, the peak position and full-width-at-half-maximum (FWHM) were determined by consulting the XPS fitting parameters from the work in Biesinger et al. and Yang et al.<sup>4, 5</sup> The binding energies and FWHM values used for the deconvolution process are tabulated in Table S3.

XPS data obtained at different take-off angles is analyzed by using Eq. S3 that relates the intensity ( $dI_z$ ) of the detected signal at depth  $z$  to the inelastic mean free path ( $\lambda$ ) at the signal kinetic energy and the take-off angle ( $\theta$ ) of the detected photoelectron relative to surface normal,<sup>6</sup>

$$dI_z = I_o \exp\left(\frac{-z}{\lambda \cos \theta}\right) dz \quad (\text{S3})$$

where  $I_o$  is the intensity of the detected signal that would have been produced if the species probed was at  $z=0$ . As a result, it is clear that signal intensity from depth  $z$  depends both on  $\theta$  and the energy. At larger take-off angles, photoelectrons travel through longer distances in the near-surface region which decreases the probed depth and causes higher signal intensity from this region.

[4] J. Yang, H. W. Liu, W. N. Martens and R. L. Frost, *J. Phys. Chem. C*, 2010, **114**, 111-119.

[5] M. C. Biesinger, B. P. Payne, A. P. Grosvenor, L. W. M. Lau, A. R. Gerson and R. S. Smart, *Appl. Surf. Sci.*, 2011, **257**, 2717-2730.

[6] D. R. Baer, M. H. Engelhard, *J. Electron. Spectrosc. Relat. Phenom.*, 2010, **178-179**, 415-432.



## Tables

Table S1. Concentration of reagents used for the synthesis of different Co<sub>3</sub>O<sub>4</sub> nanocrystals

|                         | NaOH (M) | Co(NO <sub>3</sub> ) <sub>2</sub> ·6H <sub>2</sub> O (M) |
|-------------------------|----------|----------------------------------------------------------|
| Nanocubes               | 4.35     | 1.09                                                     |
| Truncated Nanocubes     | 2.46     | 0.82                                                     |
| Truncated Nanooctahedra | 2.46     | 0.41                                                     |
| Nanooctahedra           | 4.35     | 0.54                                                     |

Table S2. Composition of different components of Co 2p<sub>3/2</sub> XPS spectra of Co<sub>3</sub>O<sub>4</sub> nanocubes and nanooctahedra.

| <b>Nanocubes</b>        | Pristine catalyst 0 ° takeoff <sup>a</sup> | Pristine catalyst 60 ° takeoff | After stability test 0 ° takeoff | After stability test 60 ° takeoff |
|-------------------------|--------------------------------------------|--------------------------------|----------------------------------|-----------------------------------|
| Component 1<br>779.8 eV | 38 %                                       | 31 %                           | 42 %                             | 47%                               |
| Component 2<br>781.1 eV | 22 %                                       | 18 %                           | 21 %                             | 15 %                              |
| Component 3<br>782.4 eV | 18 %                                       | 27 %                           | 18 %                             | 18 %                              |
| Component 4<br>785.1 eV | 16 %                                       | 19 %                           | 13 %                             | 14 %                              |
| Component 5<br>789.1 eV | 6 %                                        | 5 %                            | 6 %                              | 6 %                               |
| <b>Nano-octahedra</b>   | Pristine catalyst 0 ° takeoff              | Pristine catalyst 60 ° takeoff | After stability test 0 ° takeoff | After stability test 60 ° takeoff |
| Component 1<br>779.8 eV | 40 %                                       | 41 %                           | 40 %                             | 41 %                              |
| Component 2<br>781.1 eV | 22 %                                       | 24 %                           | 20 %                             | 20 %                              |
| Component 3<br>782.4 eV | 20 %                                       | 13 %                           | 20 %                             | 17 %                              |
| Component 4<br>785.1 eV | 13 %                                       | 16 %                           | 15 %                             | 16 %                              |
| Component 5<br>789.1 eV | 5 %                                        | 6 %                            | 5 %                              | 6 %                               |

<sup>a</sup>Zero degree takeoff angle is the emission from the surface normal

Table S3. Fitting parameters for the Co 2p<sub>3/2</sub> XPS spectra of Co<sub>3</sub>O<sub>4</sub> nanocubes and nanooctahedra.

| <b>Nanocubes</b>        | Pristine catalyst 0 ° takeoff <sup>a</sup> |           | Pristine catalyst 60 ° takeoff |           | After stability test 0 ° takeoff |           | After stability test 60 ° takeoff |           |
|-------------------------|--------------------------------------------|-----------|--------------------------------|-----------|----------------------------------|-----------|-----------------------------------|-----------|
|                         | Position (eV)                              | FWHM (eV) | Position (eV)                  | FWHM (eV) | Position (eV)                    | FWHM (eV) | Position (eV)                     | FWHM (eV) |
| Component 1<br>779.8 eV | 779.79                                     | 1.89      | 779.75                         | 1.88      | 779.84                           | 1.92      | 779.80                            | 1.90      |

|                         |                               |           |                                |           |                                  |           |                                   |           |
|-------------------------|-------------------------------|-----------|--------------------------------|-----------|----------------------------------|-----------|-----------------------------------|-----------|
| Component 2<br>781.1 eV | 781.13                        | 1.89      | 780.96                         | 1.88      | 781.18                           | 1.92      | 781.11                            | 1.90      |
| Component 3<br>782.4 eV | 782.39                        | 2.54      | 782.41                         | 2.69      | 782.33                           | 2.53      | 782.35                            | 2.34      |
| Component 4<br>785.1 eV | 785.13                        | 4.12      | 785.40                         | 4.11      | 785.09                           | 4.12      | 785.14                            | 4.18      |
| Component 5<br>789.1 eV | 789.10                        | 3.24      | 789.08                         | 3.37      | 789.14                           | 3.31      | 789.20                            | 3.30      |
| <b>Nano-octahedra</b>   | Pristine catalyst 0 ° takeoff |           | Pristine catalyst 60 ° takeoff |           | After stability test 0 ° takeoff |           | After stability test 60 ° takeoff |           |
|                         | Position (eV)                 | FWHM (eV) | Position (eV)                  | FWHM (eV) | Position (eV)                    | FWHM (eV) | Position (eV)                     | FWHM (eV) |
| Component 1<br>779.8 eV | 779.83                        | 1.90      | 779.81                         | 1.89      | 779.81                           | 1.90      | 779.82                            | 1.93      |
| Component 2<br>781.2 eV | 781.19                        | 1.90      | 781.17                         | 1.89      | 781.19                           | 1.90      | 781.30                            | 1.93      |
| Component 3<br>782.5 eV | 782.48                        | 2.56      | 782.51                         | 2.42      | 782.45                           | 2.61      | 782.54                            | 2.43      |
| Component 4<br>785.1 eV | 785.13                        | 4.42      | 784.96                         | 4.51      | 785.13                           | 4.31      | 785.21                            | 4.12      |
| Component 5<br>789.2 eV | 789.27                        | 2.98      | 789.24                         | 3.21      | 789.31                           | 3.28      | 789.30                            | 3.29      |

<sup>a</sup>Zero degree takeoff angle is the emission from the surface normal
